1 TITLE:

2 Comprehensive cross-population analysis of high-grade serous ovarian cancer supports  
3 no more than three subtypes  
4

5 AUTHORS:

6 Gregory P. Way<sup>a,b,c</sup>, James Rudd<sup>c,d</sup>, Chen Wang<sup>e</sup>, Habib Hamidi<sup>f</sup>, Brooke L. Fridley<sup>g</sup>,  
7 Gottfried Konecny<sup>f</sup>, Ellen L. Goode<sup>e</sup>, Casey S. Greene<sup>b,c,h,1</sup>, Jennifer A. Doherty<sup>c,d,2</sup>  
8

9 AFFILIATIONS:

10 <sup>a</sup>Genomics and Computational Biology Graduate Program, University of Pennsylvania,  
11 Philadelphia, PA 19103, USA

12 <sup>b</sup>Department of Systems Pharmacology and Translational Therapeutics, Perelman School  
13 of Medicine, University of Pennsylvania, Philadelphia, PA

14 <sup>c</sup>Quantitative Biomedical Sciences, Norris Cotton Cancer Center, Geisel School of  
15 Medicine at Dartmouth, Lebanon, NH

16 <sup>d</sup>Department of Epidemiology, Geisel School of Medicine at Dartmouth, Lebanon, NH

17 <sup>e</sup>Department of Health Sciences Research, Mayo Clinic, Rochester, MN

18 <sup>f</sup>Department of Medicine, David Geffen School of Medicine, University of California,  
19 Los Angeles, CA

20 <sup>g</sup>Department of Biostatistics, University of Kansas Medical Center, Kansas City, KS

21 <sup>h</sup>Department of Genetics, Geisel School of Medicine at Dartmouth, Hanover, NH  
22

23 CO-CORRESPONDING AUTHORS:

24 <sup>1</sup>10-131 SCTR 34<sup>th</sup> and Civic Center Blvd, Philadelphia, PA 19104; Phone: 215-573-  
25 2991; Fax: 215-573-9135; csgreene@upenn.edu

26 <sup>2</sup>One Medical Center Drive, Lebanon, NH 03766; Phone: 603-653-9065; Fax: 603-653-  
27 9093; Jennifer.A.Doherty@Dartmouth.edu  
28

29 AUTHOR EMAIL ADDRESSES

30 GW: gregway@upenn.edu

31 JR: james.e.rudd.gr@dartmouth.edu

32 CW: Wang.Chen@mayo.edu

33 HH: HHamidi@mednet.ucla.edu

34 BF: bfridley@kumc.edu

35 GK: GKonecny@mednet.ucla.edu

36 EG: egoode@mayo.edu

37 CG: csgreene@upenn.edu

38 JD: Jennifer.A.Doherty@dartmouth.edu  
39

40 CONFLICTS OF INTEREST:

41 The authors do not declare any conflicts of interest.  
42

43 OTHER PRESENTATIONS:

44 Aspects of this study were presented at the 2015 AACR Conference and the 2015 Rocky  
45 Mountain Bioinformatics Conference.  
46

47 RUNNING HEAD:

48 *Cross-population analysis supports no more than three ovarian cancer subtypes*

49

50 KEYWORDS:

51 Ovarian Cancer; Molecular Subtypes; Unsupervised Clustering; Reproducibility

52

53 NOTES:

54 Words: 2,926; Figures: 3; Tables 3; Sup. Figures: 9; Sup. Tables: 6; Sup. Methods

55 AUTHORS' CONTRIBUTIONS

56 Study concept and design: GW, JR, CG, JD. Original data collection and processing:  
57 CW, HH, BF, GK, EG. Data analysis: GW, JR, CG, JD. Manuscript drafting and editing:  
58 GW, JR, CG, JD. All authors read, commented on, and approved the final manuscript.

59

60

61 ABSTRACT:

62 Four gene expression subtypes of high-grade serous ovarian cancer (HGSC) have been  
63 previously described. In these studies, a fraction of samples that did not fit well into the four  
64 subtype classifications were excluded. Therefore, we sought to systematically determine the  
65 concordance of transcriptomic HGSC subtypes across populations without removing any  
66 samples. We created a bioinformatics pipeline to independently cluster the five largest mRNA  
67 expression datasets using *k*-means and non-negative matrix factorization (NMF). We  
68 summarized differential expression patterns to compare clusters across studies. While previous  
69 studies reported four subtypes, our cross-population comparison does not support four. Because  
70 these results contrast with previous reports, we attempted to reproduce analyses performed in  
71 those studies. Our results suggest that early results favoring four subtypes may have been driven  
72 by including serous borderline tumors. In summary, our analysis suggests that either two or  
73 three, but not four, gene expression subtypes are most consistent across datasets.

74

75

76 INTRODUCTION:

77 Invasive ovarian cancer is a heterogeneous disease typically diagnosed at a late stage,  
78 with high mortality [1]. The most aggressive and common histologic type is high-grade serous  
79 (HGSC) [2], characterized by extensive copy number variation and *TP53* mutation [3]. Given the  
80 genomic complexity of these tumors, mRNA expression can be thought of as a summary  
81 measurement of these genomic and epigenetic alterations, to the extent that the alterations  
82 influence gene expression in either the cancer or stroma.

83 Four gene expression subtypes with varying components of mesenchymal, proliferative,  
84 immunoreactive, and differentiated gene expression signatures have been reported in all studies  
85 of HGSC to date [3–7]. Two of these also observed survival differences across subtypes [4,5].  
86 Tothill *et al.* first identified four HGSC subtypes (as well as two other subtypes which largely  
87 included low grade serous and serous borderline tumors) in an Australian population using *k*-  
88 means clustering. Later, The Cancer Genome Atlas (TCGA) used non-negative matrix  
89 factorization (NMF) and also reported four subtypes which were labeled as: ‘mesenchymal’,  
90 ‘differentiated’, ‘proliferative’, and ‘immunoreactive’ [3]. The TCGA group also applied NMF  
91 clustering to the Tothill data, and observed concordance with four subtypes [3]. Konecny *et al.*  
92 applied NMF to cluster an independent set of HGSC samples and reported four subtypes, which  
93 they labeled as C1-C4 [5]. These subtypes were similar to those in the TCGA but a subtype  
94 classifier trained on these subtypes better differentiated survival in their own data, and in data  
95 from TCGA and Bonome *et al.* [6].

96 Despite this extensive research in the area, work to date has several limitations. In both  
97 TCGA and Tothill *et al.*, ~8-15% of samples were excluded from analyses. A reanalysis of the  
98 TCGA data showed that over 80% of the samples could be assigned to more than one subtype  
99 [8]. In more recent TCGA analyses by the Broad Institute Genome Data Analysis Center

100 (GDAC) Firehose initiative with the largest number of HGSC cases evaluated to date ( $n = 569$ ),  
101 three subtypes fit the data better than four [9,10]. This uncertainty in HGSC subtyping led us to  
102 determine if four homogeneous subtypes exist across study populations.

103 To comprehensively characterize subtypes, we analyze data from the five largest  
104 independent studies to date, including our own collection of samples, using a standardized  
105 bioinformatics pipeline. We apply  $k$ -means clustering as well as NMF to each population without  
106 removing “hard-to-classify” samples. Our goal is to rigorously assess the number of subtypes.  
107 These independent and parallel within-dataset analyses followed by cross-dataset comparison  
108 sidestep gene expression platform or dataset biases that could affect clustering if under or  
109 overcorrected. This contrasts with earlier work that pooled datasets together to identify subtypes  
110 [7] and ensures that subtypes identified are not induced by dataset or batch effects. We  
111 summarize each subtype’s expression patterns and comprehensively characterize correlations  
112 between subtype-specific gene expression across populations.

113 Our cross-population comparative analysis does not support that four HGSC subtypes  
114 exist; rather the data more strongly support an interpretation that there are either two or three  
115 subtypes. We show that the support for four subtypes observed in TCGA’s reanalysis of Tothill  
116 *et al.* [3] is lost when serous borderline tumors, which have very different genomic profiles and  
117 survival than HGSC [11,12], are excluded before clustering. Our work also highlights the impact  
118 that a single study can have on the trajectory of subtyping research and suggests the importance  
119 of periodic histopathologic review and rigorous reanalysis of existing data for cross-study  
120 commonalities.

121

122 METHODS:

123 *Data inclusion*

124           We applied inclusion criteria as described in the supplementary materials using data from  
125 the R package, curatedOvarianData [13] and our own novel dataset (“Mayo”) [5]  
126 (Supplementary Table S1). These criteria selected HGCS samples that were not duplicates from  
127 studies including at least 130 HGSC cases assayed on standard microarrays. Data from the new  
128 Mayo HGSC samples as well as other samples with mixed histologies and grades, for a total of  
129 528 additional ovarian tumor samples, was deposited in NCBI’s Gene Expression Omnibus  
130 (GEO) [14]; these data can be accessed with the accession number GSE74357  
131 (<http://www.ncbi.nlm.nih.gov/geo/query/acc.cgi?acc=GSE74357>). All study participants  
132 provided written informed consent, and this work was approved by the Mayo Clinic and  
133 Dartmouth College Institutional Review Boards.

134           After applying the unified inclusion criteria, our final analytic datasets include: TCGA (n  
135 = 499) [3,9]; Mayo (n = 379; GSE74357) [5]; Yoshihara (n = 256; GSE32062.GPL6480) [15];  
136 Tothill (n = 242; GSE9891) [4]; and Bonome (n = 185; GSE26712) [6] (Table 1). We restricted  
137 analyses to the 10,930 genes measured successfully in all five populations (Supplementary Fig.  
138 S1).

139

140 *Clustering*

141           We performed independent clustering within each dataset to avoid potential biases from  
142 different platforms or studies. As detailed in the Supplementary Methods, we identified the  
143 1,500 genes with the highest variance from each dataset and used the union of these genes (n =  
144 3,698) for clustering. We performed clustering within each dataset using each potential  $k$  from 2-  
145 8 clusters. We performed  $k$ -means clustering in each population using the R package “cluster”

146 (version 2.0.1) [16] with 20 initializations. We repeated these analyses using NMF in the R  
147 package “NMF” (version 0.20.5) [17] with 100 different random initializations for each  $k$ . As  
148 done in prior studies, we calculated cophenetic correlation coefficients to select appropriate  $k$  for  
149 each dataset after NMF clustering with 10 consensus runs for  $k = 2$  through 8.

150

### 151 *Identification of analogous clusters within and across studies*

152 We performed significance analysis of microarray (SAM) [18,19] analysis on all clusters  
153 from each study using all 10,930 genes. This resulted in a cluster-specific moderated  $t$  statistic  
154 for each of the input genes [20]. To summarize the expression patterns of all 10,930 genes for a  
155 specific cluster in a specific population, we combined gene-wise moderated  $t$  statistics into a  
156 vector of length 10,930. The TCGA subtype labels have become widely used in the field. To  
157 generate comparable labels across  $k$  and across studies, we mapped our TCGA subtype  
158 assignments back to the original TCGA labels to define reference clusters at  $k = 4$  (that is,  
159 mesenchymal-like, proliferative-like, etc.). Clusters in other populations that were most strongly  
160 correlated with the TCGA clusters were assigned the same label.

161

### 162 *Clustering analysis of randomized data*

163 Any clustering procedure is expected to induce strong correlational structure across  
164 clusters within a dataset even if there is no true underlying structure. However, if there is no true  
165 underlying structure, clusters across datasets are not expected to be correlated. To assess this, we  
166 used the same datasets but shuffled each gene’s expression vector to disrupt the correlative  
167 structure. We performed within and cross-study analyses of cluster identification using this set of  
168 data that were parallel to those performed using the non-randomized data.

169

170 *Assessing the reproducibility of single-population studies*

171         We compared our sample assignments at  $k = 2 - 4$  to the four subtypes reported in the  
172 Tothill, TCGA, and Konecny publications [3–5]. Because the labels that were assigned in  
173 TCGA’s reanalysis of the Tothill data were not available, we performed NMF consensus  
174 clustering of Tothill’s data without removing LMP samples in order to generate labels for  
175 comparison.

176

177 *Reproducibility of our analyses*

178         We provide software to download the required data and reproduce our analyses. The  
179 software is provided under a permissive open source license [21]. Analyses were run in a Docker  
180 container, allowing the computing environment to be recreated [22]. Our Docker image can be  
181 pulled from here: [https://hub.docker.com/r/gregway/hgsc\\_subtypes/](https://hub.docker.com/r/gregway/hgsc_subtypes/). This allows interested users  
182 to freely download the software, reproduce the analyses, and then build on this work.

183

184 **RESULTS:**

185 *Clustering*

186         To visually inspect the consistency and distinctness of clusters, we compared sample-by-  
187 sample correlation heatmaps. For  $k = 2$  to 4 within each study, we observed high sample-by-  
188 sample correlations within clusters and relatively low sample-by-sample correlations across  
189 clusters (Supplementary Fig. S2). Clustering results using NMF were similar to  $k$  means results  
190 (Supplementary Fig S3).

191

192 *Correlation of cluster-specific expression patterns*

193         Across datasets, we observed strong positive correlations of moderated  $t$  score vectors  
194 between analogous clusters in TCGA, Tothill, Mayo, and Yoshihara (Fig. 1; Table 2). However,  
195 clustering of the Bonome data did not correlate strongly with clusters identified in the other  
196 datasets (Table 2). We believe that we were unable to assign parallel subtypes in Bonome  
197 because of either RNA contamination or inappropriate grading assignments. However, more  
198 work is required in order to identify exactly why we were unable to classify.

199         To assess our analytical approach, we performed an analysis using randomized data. This  
200 showed that within-population correlation structure was induced by clustering, but structure  
201 between populations was not (Supplementary Fig. S4). Comparing Figure 1 with S4, we  
202 observed much higher correlation across datasets (Fig. 1), which was lost after randomization  
203 (Supplementary Fig. S4). For example, for  $k = 2$ , the TCGA and Mayo cluster correlations for  
204 analogous clusters was high (top left panel in Fig. 1). Conversely, the same relationship in  
205 randomized data (second row, first column panel in Supplementary Fig. S4) showed correlations  
206 near zero. This indicates that the high correlations observed across datasets in Figure 1 are  
207 induced by similar underlying structure in the data.

208         Across studies, positive correlations between analogous clusters and negative correlations  
209 between non-analogous clusters were stronger for clusters identified when  $k = 2$  and  $k = 3$  than  
210 when  $k = 4$  (Fig. 1), with comparable statistical precision (Supplementary Table S2). These  
211 cross-population comparisons suggested that two and three subtypes fit HGSC gene expression  
212 data more consistently than the four widely accepted subtypes.

213         Within each population, clusters identified by NMF were similar to those identified using  
214  $k$ -means clustering (Fig. 2) suggesting that these results were independent of clustering



215 algorithm. With NMF, both positive and negative correlations were stronger for  $k = 2$  and  $k = 3$   
216 than for  $k = 4$ . Across  $k = 3$  and  $k = 4$ , correlations were strongest for clusters 1 and 2. Sample  
217 cluster assignments for both  $k$ -means and NMF clusters are provided in Supplementary Table S3.

218

### 219 *Comparison with previously-identified HGSC clusters*

220 Our clustering results for the Tothill, TCGA, and Mayo datasets were highly concordant  
221 with the clustering described in the original publications [3–5], as evidenced by the high degree  
222 of consistent overlap in sample assignments to the previously-defined clusters (Table 3). Our  
223 cross-study cluster 1 was mostly mapped to the “Mesenchymal” label from TCGA, “C1” from  
224 Tothill, and “C4” from Mayo. This cluster was the most stable in our analysis within all datasets,  
225 across  $k = 2, 3$  and  $4$ , and across clustering algorithms. Cross-study cluster 2, which was also  
226 observed consistently, was most similar to the “Proliferative” label from TCGA, “C5” from  
227 Tothill, and “C3” from Mayo. Cross-study cluster 3 for  $k = 3$  was associated with both the  
228 “Immunoreactive” and “Differentiated” TCGA labels, “C2” and “C4” in Tothill, and “C1” and  
229 “C2” in Mayo. For analyses where  $k = 4$ , the third cluster was associated with  
230 “Immunoreactive”, “C2”, and “C1” while the fourth cluster was associated with “Differentiated”,  
231 “C4”, and “C2” for TCGA, Tothill, and Mayo respectively.

232

### 233 *Meta-research into previous HGSC subtyping studies*

234 Each of the publications that only considered high-grade samples (TCGA and Konecny *et*  
235 *al.*) found clustering coefficients consistent with  $k = 2, k = 3$ , and  $k = 4$ . Nevertheless, each  
236 publication concludes the existence of four subtypes, while our cross-population analysis  
237 suggested that two or three clusters fit HGSC data better than four clusters.

238 To compare with previous results, we evaluated the number of subtypes that fit the data  
239 best within each study by calculating cophenetic correlation coefficients at  $k = 2$  through  $k=8$   
240 clusters inclusively. We observed a similar pattern in each population (Supplementary Fig S5 –  
241 S7; Fig. 3A) in which the highest cophenetic correlation was reached for two clusters and, based  
242 on the heatmaps, appeared to have the highest consensus. In every dataset, four clusters were not  
243 observed to represent the data better than two or three. The only results in previous studies that  
244 contradicted this work were from TCGA’s reanalysis of the Tothill data. According to  
245 supplemental figure S6.2 in the TCGA paper, the reanalysis included serous borderline tumors  
246 (i.e., tumors with low malignant potential) ( $n = 18$ ). The inclusion of these tumors in the TCGA  
247 HGSC analyses was done even though, in the original Tothill paper, the serous borderline tumors  
248 had a unique gene expression patterns and clustered entirely in a group labeled “C3”.

249 To assess the extent to which serous borderline tumors inclusion drove the TCGA results,  
250 we reproduced TCGA’s reanalysis of Tothill *et al.*, including the serous borderline tumors ( $n =$   
251 18); we indeed observed that the cophenetic correlation is higher for  $k = 4$  than  $k = 3$  (Fig. 3A).  
252 However, when we appropriately removed these serous borderline tumors we observed an  
253 increase in the  $k = 3$  cophenetic correlation (Fig. 3B). The results that support four subtypes were  
254 generated during clustering of HGSC and serous borderline tumors combined. Subtyping  
255 analyses of HGSC alone reveal less than four subtypes. Even after subtyping there remains a  
256 complex and nuanced portrait of the disease.

257

## 258 DISCUSSION:

259 Although prior studies have reported the existence of four molecular subtypes of HGSC  
260 ovarian cancer [3–5,9], our analysis suggests the existence of only two or three subtypes. This

261 conclusion is based on our observation that concordance of analogous subtypes across study  
262 populations was stronger for two or three clusters as opposed to four. Previous studies used  
263 either *k*-means or NMF clustering, and because our results contradicted prior work, we  
264 performed analyses using both of these methods. Results for each population were similar for the  
265 *k* means and NMF clustering algorithms suggesting that the clustering algorithm did not drive the  
266 observed differences.

267         Because cross-population comparisons suggest that two and three clusters show more  
268 consistency than four, we explored within-study heuristics (cophenetic correlation coefficients)  
269 that suggested four subtypes in previous research. The cophenetic coefficient measures how  
270 precisely a dendrogram retains sample by sample pairwise distances and can be used to compare  
271 clustering accuracy [23]. While both Konecny and TCGA reported four subtypes, in both  
272 analyses  $k = 2$  and  $k = 3$  resulted in higher cophenetic coefficients than  $k = 4$  (Konecny Figure  
273 2A and TCGA Figure S6.1) [3, 5]. We observed the same patterns in our own reanalysis of  
274 TCGA and analysis of the expanded Mayo cohort (Supplementary Figs. S5 and S6). Yoshihara  
275 and Tothill did not report cophenetic coefficients, but our analysis of each (Supplementary Fig  
276 S7 and Fig 3A) revealed similar patterns to TCGA and Konecny.

277         In the previous literature, the only report to suggest that three subtypes were  
278 inappropriate was TCGA's reanalysis of the Tothill *et al.* data (supplemental Figure S6.2 in their  
279 publication); the cophenetic coefficient dropped dramatically at  $k = 3$  before recovering at  $k = 4$   
280 [3]. Notably, TCGA's figure legend for this supplemental result indicates that they did not  
281 remove serous borderline tumors from the Tothill data. Our analysis of Tothill *et al.* differed  
282 from TCGA's in that we excluded serous borderline tumors and instead supports the existence of  
283 two or three subtypes. To evaluate the influence of these serous borderline tumors in the Tothill

284 data, we repeated our analyses including serous borderline tumors, and observed a drop in the  
285 cophenetic coefficient for  $k = 3$  relative to  $k = 4$  (Fig. 3). This suggests that the four subtypes  
286 observed in TCGA’s analysis of the Tothill data may be due, in part, to the inclusion of serous  
287 borderline tumors.

288         There are several limitations to note in the HGSC data we analyzed. Given the intra-  
289 tumor heterogeneity that is likely to exist [24], our approach would be strengthened by having  
290 data on multiple areas of the tumors. Additionally, since histology and grade classification have  
291 changed over time [25,26], it is unclear whether the populations we studied used comparable  
292 guidelines to determine histology and grade. We attempted to exclude all low grade serous and  
293 low grade endometrioid samples because they often have very different gene expression patterns  
294 and more favorable survival compared to their higher grade counterparts [2]. While the Bonome  
295 publication specified that they included only high-grade tumors, grade is not included in the  
296 Bonome GSE26712 data set, so we were unable to determine whether the grade distribution  
297 differs from the other studies [6]. It is unclear why the Bonome clusters did not correspond to the  
298 clusters observed in other populations. Lack of consistency could result from a different  
299 distribution of grade or other unreported biological differences.

300         In summary, our study demonstrates that two clusters of HGSC, “mesenchymal-like” and  
301 “proliferative-like”, are clearly and consistently identified within and between populations. This  
302 suggests that there are two reproducible HGSC subtypes that are either etiologically distinct, or  
303 acquire phenotypically determinant alterations through their development. Our study also  
304 suggests that the previously described “immunoreactive-like” and “differentiated-like” subtypes  
305 appear more variable across populations, and tend to be collapsed into a single category when

306 three subtypes are specified. These may represent, for example, steps along an immunoreactive  
307 continuum or could represent the basis of a third, but more variable subtype.

308 Our analysis also reveals the importance of critically reassessing molecular subtypes  
309 across multiple large study populations using parallel analyses and consistent inclusion criteria.  
310 New systematic approaches hold promise for the implementation of such analyses [27]. Our  
311 results underscore the importance of ovarian cancer histopathology, contradict the four HGSC  
312 subtype hypothesis, and suggest that there may be fewer HGSC molecular subtypes with variable  
313 immunoreactivity and stromal infiltration.

314

#### 315 ACKNOWLEDGEMENTS:

316 We would like to thank Sebastian Armasu and Hsiao-Wang Chen for help with statistical  
317 analyses and data processing and Emily Kate Shea for helpful discussions.

318

#### 319 FUNDING:

320 This work was supported the National Cancer Institute at the National Institutes of Health  
321 (R01 CA168758 to J.A.D., F31 CA186625 to J.R., R01 CA122443 to E.L.G.); the Mayo Clinic  
322 Ovarian Cancer SPORE (P50 CA136393 to E.L.G.); the Mayo Clinic Comprehensive Cancer  
323 Center-Gene Analysis Shared Resource (P30 CA15083); the Gordon and Betty Moore  
324 Foundation's Data-Driven Discovery Initiative (grant number GBMF 4552 to C.S.G.); and the  
325 American Cancer Society (grant number IRG 8200327 to C.S.G.), and by Norris Cotton Cancer  
326 Center Developmental Funds.

327

#### 328 FIGURE LEGENDS:

329

330 **Figure 1.** Significance analysis of microarray (SAM) moderated  $t$  score Pearson correlation  
331 heatmaps reveal consistency across datasets. (A) Correlations across datasets for  $k$  means  $k = 2$ .  
332 (B) Correlations across datasets for  $k$  means  $k = 3$ . (C) Correlations across datasets for  $k$  means  $k$   
333 = 4

334

335 **Figure 2.** Significance analysis of microarray (SAM) moderated  $t$  score Pearson correlation  
336 heatmaps of clusters formed by  $k$  means clustering and NMF clustering reveals consistency  
337 across clustering methods. Within dataset results are shown for both methods when setting each  
338 algorithm to find 2, 3, and 4 clusters.

339

340 **Figure 3.** Comparing NMF consensus clustering in the Tothill dataset. Data displays consensus  
341 clustering for  $k = 2$  to  $k = 6$  for 10 NMF initializations alongside the cophenetic correlation  
342 results for  $k = 2$  to  $k = 8$ . (A) Tothill dataset ( $n = 260$ ) with low malignant potential (LMP)  
343 samples ( $n = 18$ ) not removed prior to clustering. (B) Tothill dataset with LMP samples removed  
344 ( $n = 242$ ).

345

346 **Supplementary Figure S1.** Overlapping genes assayed using either the HG-U1133 Affymetrix  
347 platform (TCGA, Tothill, Bonome) or the Agilent 4x44K platform (Mayo, Yoshihara).  
348 Differences across datasets arise from inherent array differences and/or differences in quality  
349 control preprocessing.

350

351 **Supplementary Figure S2.** Sample by sample Pearson correlation matrices. Top panel:  $k = 2$ .  
352 Middle panel:  $k = 3$ . Bottom panel:  $k = 4$ . The color bars are coded as blue for cluster 1, red for  
353 cluster 2, green for cluster 3, and purple for cluster 4. In the matrices, red represents high  
354 correlation, blue low correlation, and white intermediate correlation. The scales are slightly  
355 different in each population because of different correlational structures. The clusters in the  
356 Bonome study are depicted in gray scale because in cross-population analyses to identify  
357 analogous clusters, those from Bonome did not correlate with those observed in the four other  
358 studies.

359  
360 **Supplementary Figure S3.** NMF consensus matrices for datasets when  $k = 2$ ,  $k = 3$ , and  $k = 4$ .  
361 The first track represents cluster membership for  $k$  means clusters and the second track  
362 represents silhouette widths. Note that NMF clusters are not ordered in the same way as the  $k$   
363 means clusters.

364  
365 **Supplementary Figure S4.** Significance analysis of microarray (SAM) moderated  $t$  score  
366 Pearson correlation heatmaps are not consistent across datasets for randomly shuffled gene  
367 expression values for  $k = 2$ ,  $k = 3$ , or  $k = 4$ . The within dataset correlations are artificially  
368 induced because the clustering algorithm will find clusters even without true underlying  
369 structure. However, the across dataset clusters are not correlated in the randomized data  
370 indicating that the results we observe in Figure 1 are not artifacts of the clustering algorithm.

371  
372 **Supplementary Figure S5.** Consensus NMF clustering of the TCGA dataset ( $n = 499$ ) for  $k = 2$   
373 to  $k = 6$  for 10 NMF runs alongside the cophenetic correlation results for  $k = 2$  to  $k = 8$ .

374

375 **Supplementary Figure S6.** Consensus NMF clustering of the Mayo dataset ( $n = 379$  for  $k = 2$  to  
376  $k = 6$  for 10 NMF runs alongside the cophenetic correlation results for  $k = 2$  to  $k = 8$ .

377

378 **Supplementary Figure S7.** Consensus NMF clustering of the Yoshihara dataset ( $n = 256$ ) for  $k$   
379  $= 2$  to  $k = 6$  for 10 NMF runs alongside the cophenetic correlation results for  $k = 2$  to  $k = 8$ .

380

381 **Supplementary Figure S8.** Silhouette width plots for  $k = 2$ ,  $k = 3$ , and  $k = 4$  for  $k$  means  
382 clustering results. Cluster 1 is shown in blue, cluster 2 in red, cluster 3 in green, and cluster 4 in  
383 purple.

384

385 **Supplementary Figure S9.** Kaplan-Meier survival curves for  $k = 2$ ,  $k = 3$ , and  $k = 4$  shown for  
386 clustering solutions using  $k$  means and NMF. Cluster 1 is shown in blue, cluster 2 in red, cluster  
387 3 in green, and cluster 4 in purple.

388

#### 389 REFERENCES:

- 390 1. Kurman RJ, Shih I-M. The Origin and Pathogenesis of Epithelial Ovarian Cancer: A  
391 Proposed Unifying Theory: *Am J Surg Pathol.* 2010;34: 433–443.  
392 doi:10.1097/PAS.0b013e3181cf3d79
- 393 2. Vang R, Shih I-M, Kurman RJ. Ovarian Low-grade and High-grade Serous Carcinoma:  
394 Pathogenesis, Clinicopathologic and Molecular Biologic Features, and Diagnostic  
395 Problems. *Adv Anat Pathol.* 2009;16: 267–282. doi:10.1097/PAP.0b013e3181b4fffa
- 396 3. The Cancer Genome Atlas. Integrated genomic analyses of ovarian carcinoma. *Nature.*  
397 2011;474: 609–615. doi:10.1038/nature10166
- 398 4. Tothill RW, Tinker AV, George J, Brown R, Fox SB, Lade S, et al. Novel Molecular  
399 Subtypes of Serous and Endometrioid Ovarian Cancer Linked to Clinical Outcome. *Clin*  
400 *Cancer Res.* 2008;14: 5198–5208. doi:10.1158/1078-0432.CCR-08-0196



- 401 5. Konecny GE, Wang C, Hamidi H, Winterhoff B, Kalli KR, Dering J, et al. Prognostic and  
402 Therapeutic Relevance of Molecular Subtypes in High-Grade Serous Ovarian Cancer. *JNCI*  
403 *J Natl Cancer Inst.* 2014;106: dju249–dju249. doi:10.1093/jnci/dju249
- 404 6. Bonome T, Levine DA, Shih J, Randonovich M, Pise-Masison CA, Bogomolny F, et al. A  
405 gene signature predicting for survival in suboptimally debulked patients with ovarian  
406 cancer. *Cancer Res.* 2008;68: 5478–5486. doi:10.1158/0008-5472.CAN-07-6595
- 407 7. Tan TZ, Miow QH, Huang RY-J, Wong MK, Ye J, Lau JA, et al. Functional genomics  
408 identifies five distinct molecular subtypes with clinical relevance and pathways for growth  
409 control in epithelial ovarian cancer: A subtyping scheme for epithelial ovarian cancer.  
410 *EMBO Mol Med.* 2013;5: 1051–1066. doi:10.1002/emmm.201201823
- 411 8. Verhaak RGW, Tamayo P, Yang J-Y, Hubbard D, Zhang H, Creighton CJ, et al.  
412 Prognostically relevant gene signatures of high-grade serous ovarian carcinoma. *J Clin*  
413 *Invest.* 2012; doi:10.1172/JCI65833
- 414 9. Broad Institute TCGA Genome Data Analysis Center. Analysis Overview for Ovarian  
415 Serous Cystadenocarcinoma (Primary solid tumor cohort) - 15 July 2014. 2014;  
416 doi:10.7908/C1QR4VX4
- 417 10. Broad Institute TCGA Genome Data Analysis Center. Clustering of mRNA expression:  
418 consensus NMF. 2015; doi:10.7908/C1BR8R71
- 419 11. Ouellet V, Provencher DM, Maugard CM, Le Page C, Ren F, Lussier C, et al.  
420 Discrimination between serous low malignant potential and invasive epithelial ovarian  
421 tumors using molecular profiling. *Oncogene.* 2005;24: 4672–4687.  
422 doi:10.1038/sj.onc.1208214
- 423 12. Bonome T, Lee J-Y, Park D-C, Radonovich M, Pise-Masison C, Brady J, et al. Expression  
424 profiling of serous low malignant potential, low-grade, and high-grade tumors of the ovary.  
425 *Cancer Res.* 2005;65: 10602–10612. doi:10.1158/0008-5472.CAN-05-2240
- 426 13. Ganzfried BF, Riester M, Haibe-Kains B, Risch T, Tyekucheva S, Jazic I, et al.  
427 curatedOvarianData: clinically annotated data for the ovarian cancer transcriptome.  
428 *Database.* 2013;2013: bat013–bat013. doi:10.1093/database/bat013
- 429 14. Edgar R, Domrachev M, Lash AE. Gene Expression Omnibus: NCBI gene expression and  
430 hybridization array data repository. *Nucleic Acids Res.* 2002;30: 207–210.
- 431 15. Yoshihara K, Tsunoda T, Shigemizu D, Fujiwara H, Hatae M, Fujiwara H, et al. High-Risk  
432 Ovarian Cancer Based on 126-Gene Expression Signature Is Uniquely Characterized by  
433 Downregulation of Antigen Presentation Pathway. *Clin Cancer Res.* 2012;18: 1374–1385.  
434 doi:10.1158/1078-0432.CCR-11-2725
- 435 16. Maechler M, Rousseeuw P, Struyf A, Hubert M, Hornik K. cluster: Cluster Analysis Basics  
436 and Extensions. 2014;R package version 1.15.3.

- 437 17. Brunet J-P, Tamayo P, Golub TR, Mesirov JP. Metagenes and molecular pattern discovery  
438 using matrix factorization. *Proc Natl Acad Sci.* 2004;101: 4164–4169.  
439 doi:10.1073/pnas.0308531101
- 440 18. Tusher VG, Tibshirani R, Chu G. Significance analysis of microarrays applied to the  
441 ionizing radiation response. *Proc Natl Acad Sci.* 2001;98: 5116–5121.  
442 doi:10.1073/pnas.091062498
- 443 19. Schwender H, Krause A, Ickstadt K. Identifying interesting genes with sigenes. *RNews.*  
444 2006;6: 45–50.
- 445 20. Schwender H. siggenes: Multiple testing using SAM and Efron’s empirical Bayes  
446 approaches. 2012;R package version 1.40.0.
- 447 21. Gregory Way, James Rudd, Casey Greene. Analytical Code for “Cross-population analysis  
448 of high-grade serous ovarian cancer reveals only two robust subtypes.” 2015;  
449 doi:10.5281/zenodo.32906
- 450 22. Boettiger C. An introduction to Docker for reproducible research. *ACM SIGOPS Oper Syst*  
451 *Rev.* 2015;49: 71–79. doi:10.1145/2723872.2723882
- 452 23. Sokal RR, Rohlf FJ. The Comparison of Dendrograms by Objective Methods. *Taxon.*  
453 1962;11: 33. doi:10.2307/1217208
- 454 24. Blagden SP. Harnessing Pandemonium: The Clinical Implications of Tumor Heterogeneity  
455 in Ovarian Cancer. *Front Oncol.* 2015;5. doi:10.3389/fonc.2015.00149
- 456 25. Silverberg SG. Histopathologic grading of ovarian carcinoma: a review and proposal. *Int J*  
457 *Gynecol Pathol Off J Int Soc Gynecol Pathol.* 2000;19: 7–15.
- 458 26. Soslow RA. Histologic Subtypes of Ovarian Carcinoma: An Overview. *Int J Gynecol*  
459 *Pathol.* 2008;PAP. doi:10.1097/PGP.0b013e31815ea812
- 460 27. Planey CR, Gevaert O. CoINcIDE: A framework for discovery of patient subtypes across  
461 multiple datasets. *Genome Med.* 2016;8. doi:10.1186/s13073-016-0281-4

462

463

464

465

466

467

468

469 **Table 1:** Characteristics of the populations included in the five analytic data sets

|                                   | TCGA                   | Mayo          | Yoshihara <i>et al.</i> | Tothill <i>et al.</i> | Bonome <i>et al.</i> |
|-----------------------------------|------------------------|---------------|-------------------------|-----------------------|----------------------|
| GEO                               |                        | GSE74357      | GSE32062                | GSE9891               | GSE26712             |
| Platform                          | Affy HGU1133           | Agilent 4x44K | Agilent 4x44K           | Affy HGU1133          | Affy HGU1133         |
| Population                        | United States          | United States | Japan                   | Australia             | United States        |
| Original Sample Size              | 578                    | 528           | 260                     | 285                   | 195                  |
| Analytic Sample Size <sup>b</sup> | 499                    | 379           | 256                     | 242                   | 185                  |
| Age [Mean (SD)]                   | 60.0 (11.6)            | 62.9 (11.3)   | NA                      | 60.3 (10.3)           | 61.5 (11.9)          |
| Stage                             |                        |               |                         |                       |                      |
| I                                 | 10 (2%)                | 7 (3%)        | 0 (0%)                  | 11 (5%)               | 0 (0%)               |
| II                                | 17 (4%)                | 11 (3%)       | 0 (0%)                  | 8 (4%)                | 0 (0%)               |
| III                               | 351 (80%)              | 275 (73%)     | 202 (79%)               | 178 (83%)             | 146 (80%)            |
| IV                                | 63 (14%)               | 86 (23%)      | 54 (21%)                | 17 (8%)               | 36 (20%)             |
| Grade                             |                        |               |                         |                       |                      |
| 2                                 | 55 (12%)               | 3 (1%)        | 130 (51%)               | 80 (37%)              | NA                   |
| 3                                 | 386 (88%) <sup>a</sup> | 376 (99%)     | 126 (49%)               | 134 (63%)             | NA                   |
| Debulking                         |                        |               |                         |                       |                      |
| Optimal                           | 325 (74%)              | 287 (76%)     | 101 (39%)               | 132 (62%)             | 89 (49%)             |
| Suboptimal                        | 116 (26%)              | 87 (23%)      | 155 (61%)               | 82 (38%)              | 93 (51%)             |

470

471 NA: Data not reported

472 <sup>a</sup>One sample was labeled as 'Grade 4' in TCGA

473 <sup>b</sup>samples without survival data were excluded in survival analyses

474 **Table 2:** SAM moderated  $t$  score vector Pearson correlations between analogous clusters across  
 475 populations<sup>a</sup>

|                  | Cluster 1    | Cluster 2    | Cluster 3   | Cluster 4   |
|------------------|--------------|--------------|-------------|-------------|
| $k = 2^a$        | 0.62 – 0.81  | 0.62 – 0.81  | NA          | NA          |
| $k = 3^a$        | 0.77 - 0.85  | 0.80 - 0.90  | 0.65 - 0.77 | NA          |
| $k = 4^a$        | 0.77 - 0.85  | 0.83 - 0.89  | 0.51 - 0.76 | 0.61 - 0.75 |
| Bonome $k = 2^b$ | -0.08 – 0.24 | -0.08 – 0.24 | NA          | NA          |
| Bonome $k = 3^b$ | 0.45 – 0.46  | -0.02 - 0.12 | 0.22 - 0.42 | NA          |
| Bonome $k = 4^b$ | 0.50 - 0.57  | -0.04 - 0.04 | 0.13 - 0.29 | 0.26 - 0.43 |

476 <sup>a</sup>Correlation ranges for TCGA, Mayo, Yoshihara, and Tothill.

477 <sup>b</sup>Bonome is removed from gene set analyses because of low correlating clusters

478

479

480

481

482

483

484

485

486

487

488 **Table 3:** Distributions of sample membership in the clusters identified in our study by the  
 489 original cluster assignments in the TCGA, Tothill, and Konecny studies. Clusters identified in  
 490 our study using  $k$ -means clustering with  $k = 2$ ,  $k = 3$ , and  $k = 4$

|           | TCGA |     |     |     |                 | Tothill <i>et al.</i> |    |    |    |    |    |                 | Konecny <i>et al.</i> |    |    |    |                 |
|-----------|------|-----|-----|-----|-----------------|-----------------------|----|----|----|----|----|-----------------|-----------------------|----|----|----|-----------------|
|           | Mes  | Pro | Imm | Dif | NC <sup>a</sup> | C1                    | C2 | C3 | C4 | C5 | C6 | NC <sup>a</sup> | C1                    | C2 | C3 | C4 | NA <sup>b</sup> |
| $k = 2$   |      |     |     |     |                 |                       |    |    |    |    |    |                 |                       |    |    |    |                 |
| Cluster 1 | 98   | 7   | 93  | 68  | 21              | 78                    | 39 | 1  | 0  | 0  | 0  | 11              | 36                    | 21 | 2  | 26 | 114             |
| Cluster 2 | 1    | 127 | 2   | 60  | 22              | 0                     | 5  | 5  | 44 | 35 | 2  | 22              | 6                     | 39 | 41 | 0  | 94              |
| $k = 3$   |      |     |     |     |                 |                       |    |    |    |    |    |                 |                       |    |    |    |                 |
| Cluster 1 | 98   | 2   | 20  | 11  | 6               | 77                    | 22 | 0  | 0  | 0  | 0  | 6               | 16                    | 13 | 2  | 26 | 82              |
| Cluster 2 | 1    | 111 | 0   | 11  | 16              | 1                     | 0  | 0  | 3  | 35 | 2  | 5               | 0                     | 16 | 36 | 0  | 56              |
| Cluster 3 | 0    | 21  | 75  | 106 | 21              | 0                     | 22 | 6  | 41 | 0  | 0  | 22              | 26                    | 31 | 5  | 0  | 70              |
| $k = 4$   |      |     |     |     |                 |                       |    |    |    |    |    |                 |                       |    |    |    |                 |
| Cluster 1 | 97   | 4   | 12  | 12  | 5               | 74                    | 0  | 0  | 0  | 0  | 0  | 0               | 7                     | 12 | 3  | 25 | 62              |
| Cluster 2 | 1    | 85  | 0   | 0   | 13              | 1                     | 0  | 0  | 1  | 34 | 2  | 5               | 0                     | 9  | 31 | 0  | 41              |
| Cluster 3 | 0    | 5   | 80  | 3   | 12              | 3                     | 42 | 0  | 1  | 1  | 0  | 14              | 29                    | 6  | 0  | 1  | 57              |
| Cluster 4 | 1    | 40  | 3   | 113 | 13              | 0                     | 2  | 6  | 42 | 0  | 0  | 14              | 6                     | 33 | 9  | 0  | 48              |

491

492 <sup>a</sup>NC = Samples not clustered in original publication

493 <sup>b</sup>NA = Samples not assessed at the time of the original publication

494 NOTE: The corresponding labels for the generally similar HGSC gene expression subtypes

495 observed in the TCGA, Tothill, and Konecny studies are, respectively: mesenchymal/C1/C4,

496 proliferative/C5/C3, immunoreactive/C2/C1, and differentiated/C4/C2)

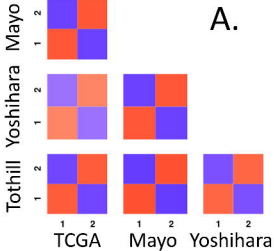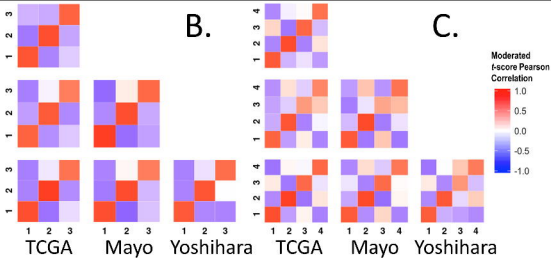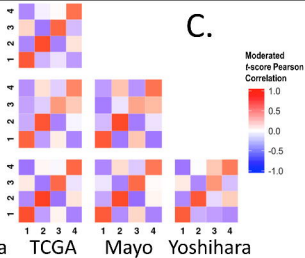

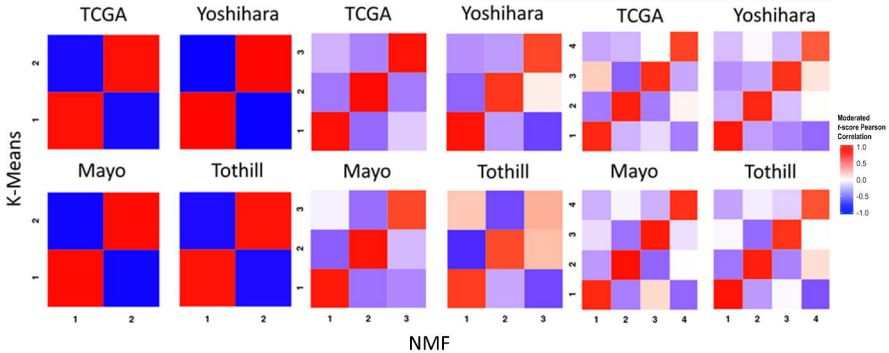

**A.**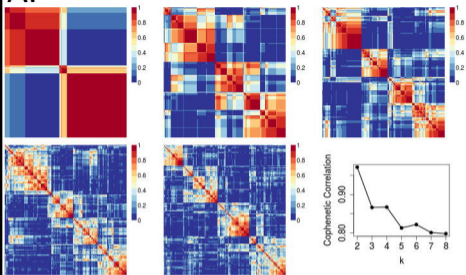**B.**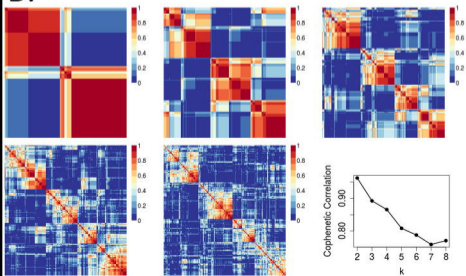



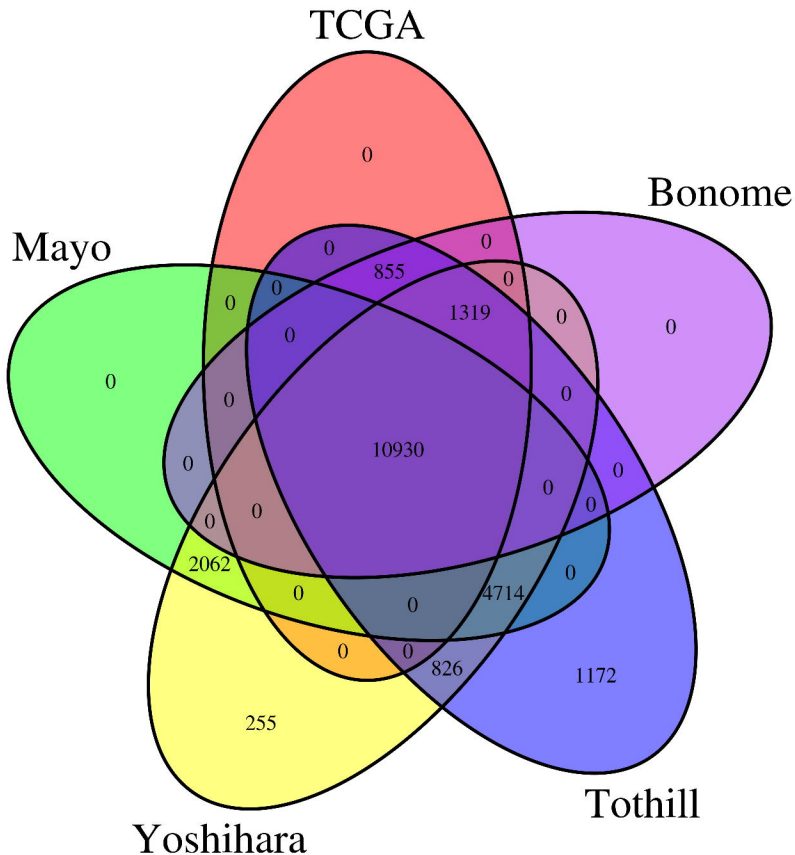

$k=2$

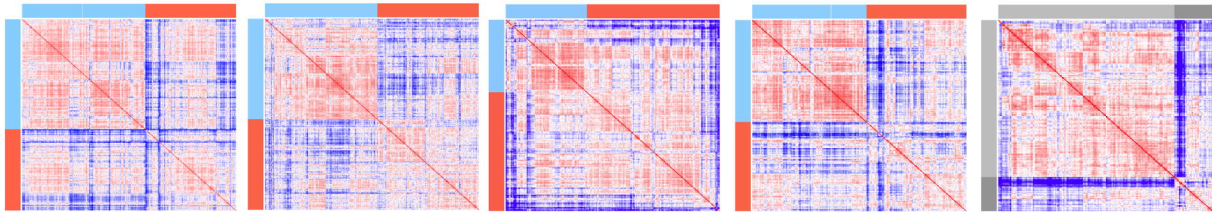

$k=3$

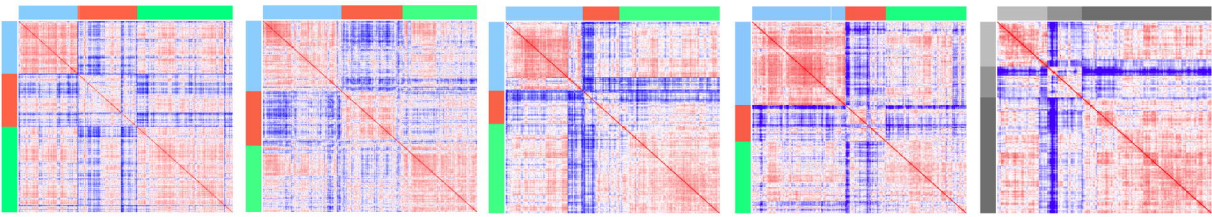

$k=4$

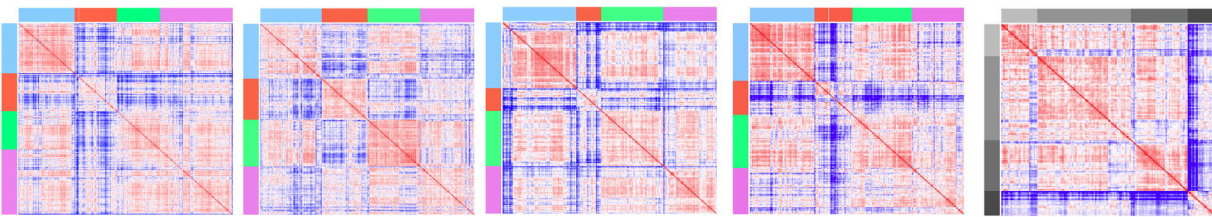

TCGA

Mayo

Yoshihara

Tothill

Bonome

$k = 2$ 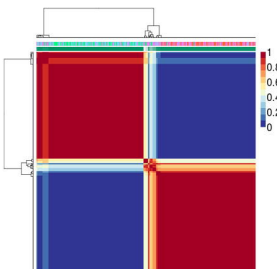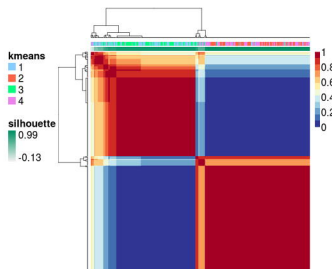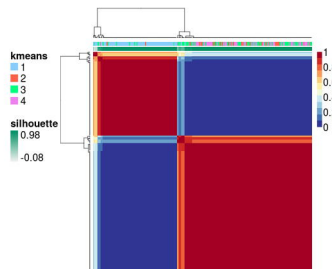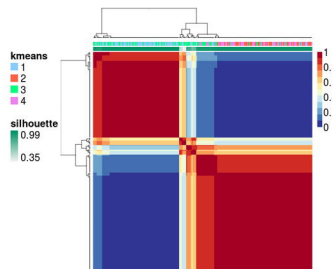 $k = 3$ 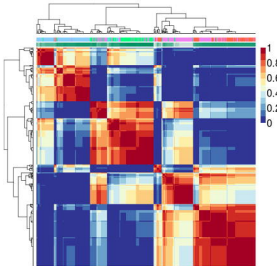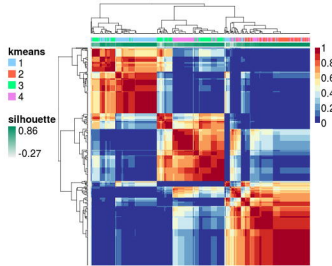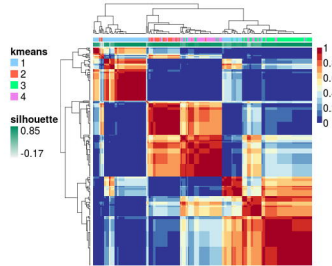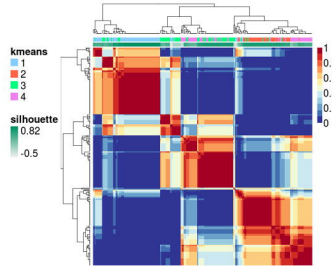 $k = 4$ 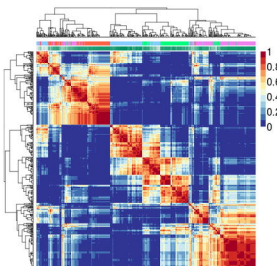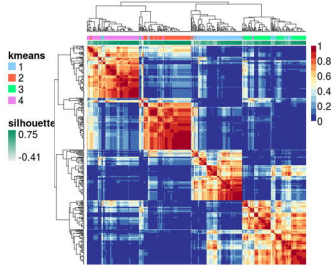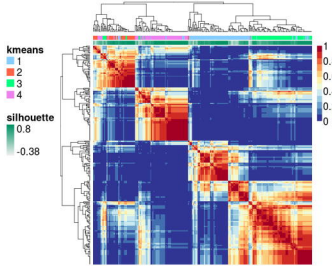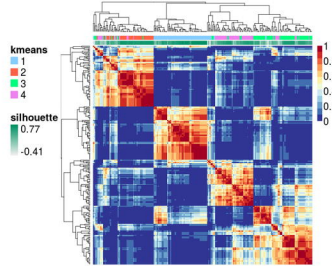

TCGA

Mayo

Yoshihara

Tothill

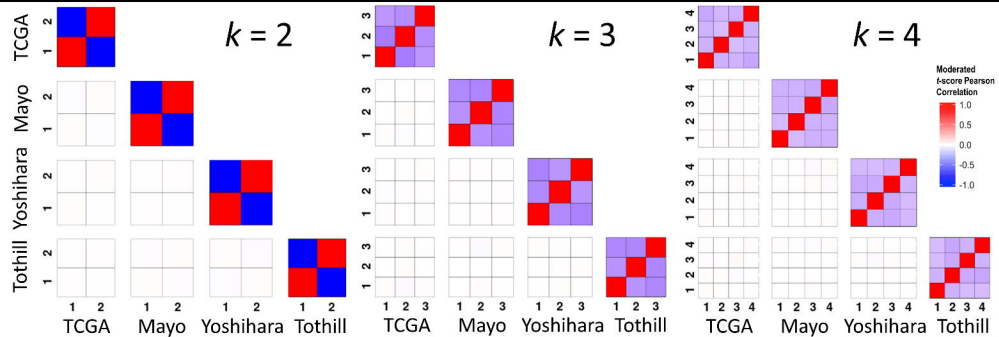

# TCGA

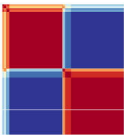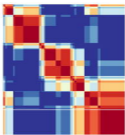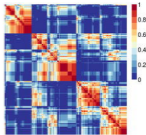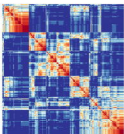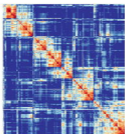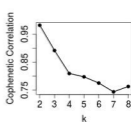

# Mayo

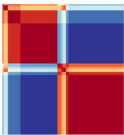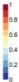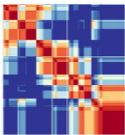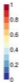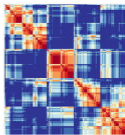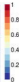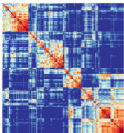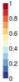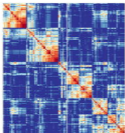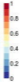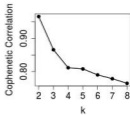

# Yoshihara

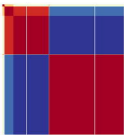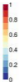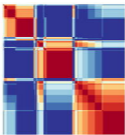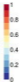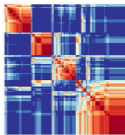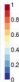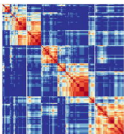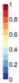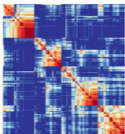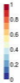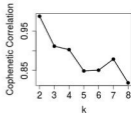

# TCGA

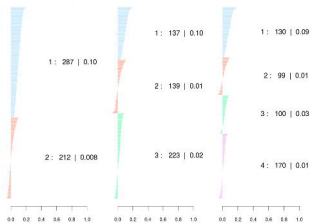

# Yoshihara

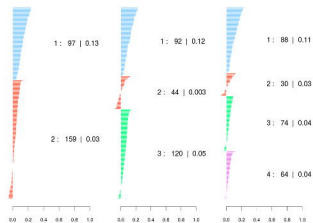

# Mayo

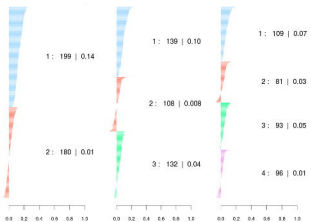

# Tothill

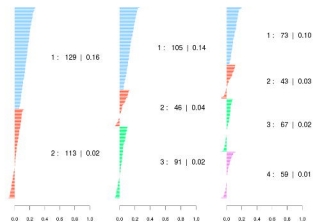



TCGA

Yoshihara

*k* means

NMF

*k* means

NMF

Cumulative Survival

*k* = 2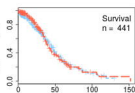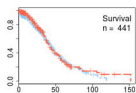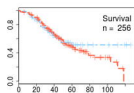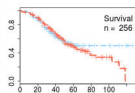*k* = 3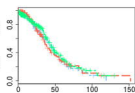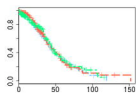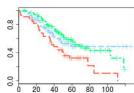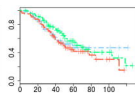*k* = 4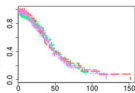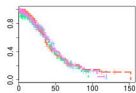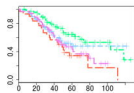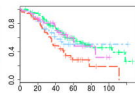

Clusters

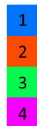

Cumulative Survival

Mayo

Tothill

*k* = 2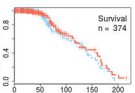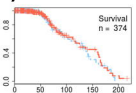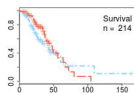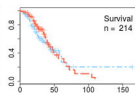*k* = 3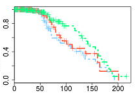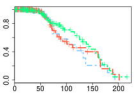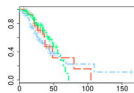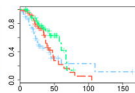*k* = 4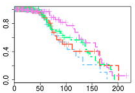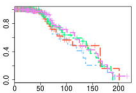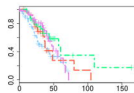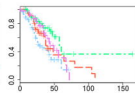

Months
